# Supplementary material for: Highly conductive PEDOT:PSS treated by sodium dodecyl sulfate for stretchable fabric heaters
Source: Royal Society of Chemistry journal article supplement (doi:10.1039/c6ra24749k), 2016-10-20
Supplement: c6ra24749k1.pdf [file c6ra24749k1.pdf]

## **Highly Conductive PEDOT:PSS Treated by Sodium Dodecyl Sulfate for Stretchable Fabric Heaters**

Changbong Yeon<sup>1,2</sup>, Gayoung Kim<sup>1,2</sup>, Jung Wook Lim<sup>1,2</sup>, and Sun Jin Yun<sup>1,2,\*</sup>

<sup>1</sup>ICT Materials & Components & Research Laboratory, Electronics and Telecommunications Research Institute, 218 Gajeongno, Yuseong-gu, Daejeon 305-700, Korea

<sup>2</sup>Department of Advanced Device Engineering, University of Science and Technology, 217 Gajeongno, Yuseong-gu, Daejeon 305-350, Korea

### **Send correspondence to**

Sun Jin Yun\*

Director

IT Materials Technology Research Section,

Electronics and Telecommunications Research Institute

Professor, University of Science and Technology

TEL : 82-42-860-5821

Fax : 82-42-860-6495

E-mail : sjyun@etri.re.kr

Supplementary Figure 1.

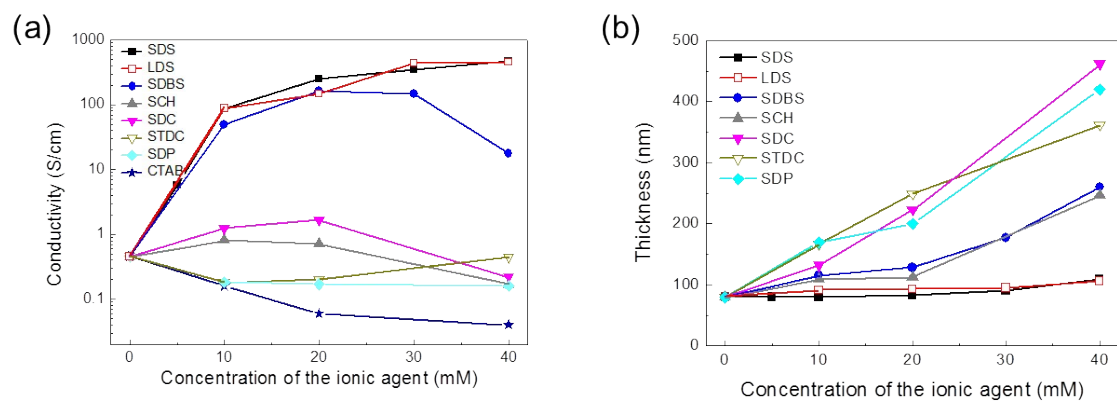

**Fig. S1** (a) Average conductivity and (b) thickness of PEDOT:PSS film blended by ionic agents with various functional groups

Supplementary Figure 2.

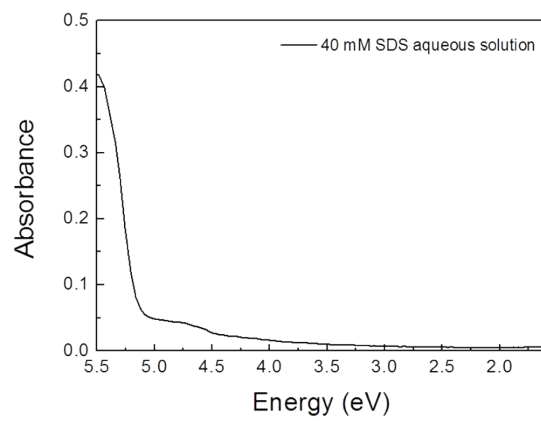

**Fig. S2** UV-Vis/NIR absorption of SDS solution (40 mM)

Supplementary Figure 3.

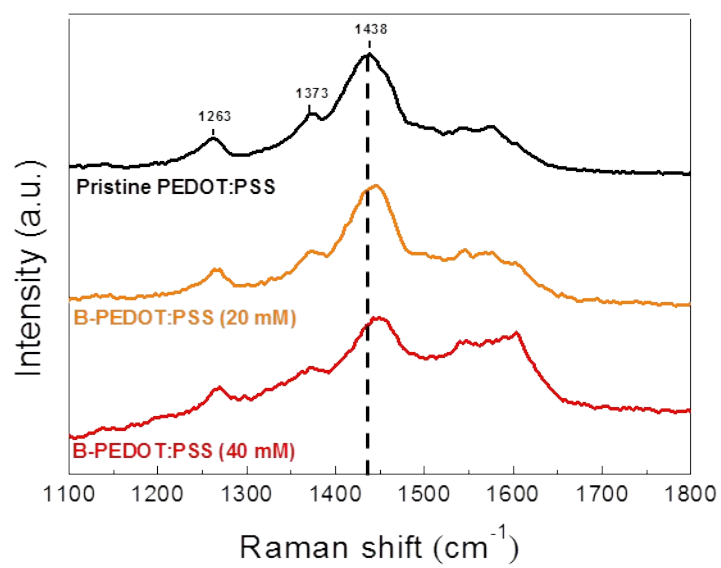

**Fig. S3** Raman spectra of pristine- and B-PEDOT:PSS films

Supplementary Figure 4.

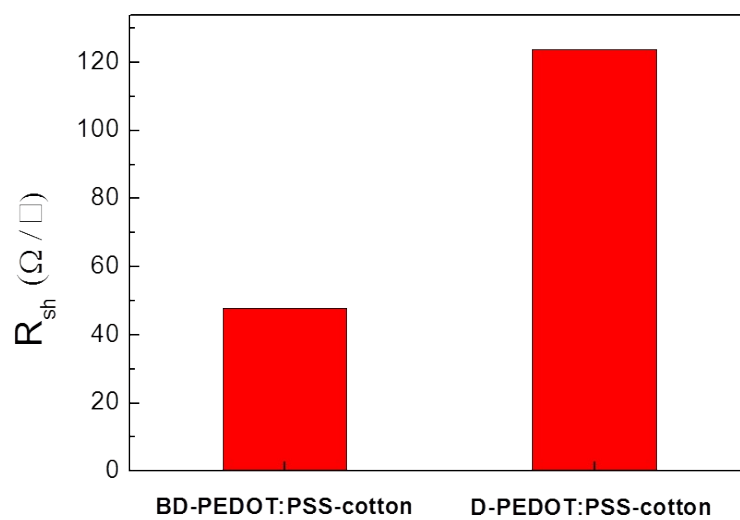

**Fig. S4** Sheet resistance of D-PEDOT:PSS-cotton and BD-PEDOT:PSS-cotton

Supplementary Figure 5.

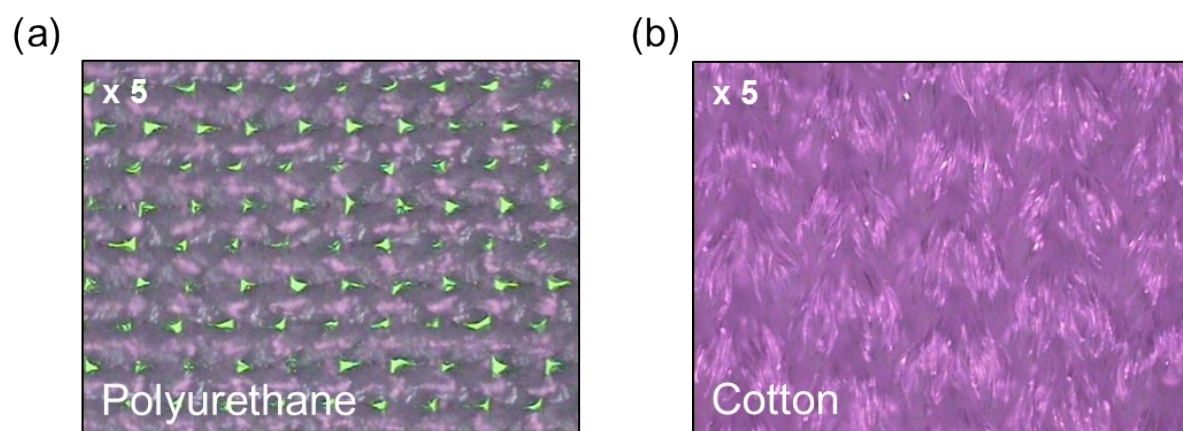

**Fig. S5** Optical images of polyurethane and cotton substrates

Supplementary Figure 6.

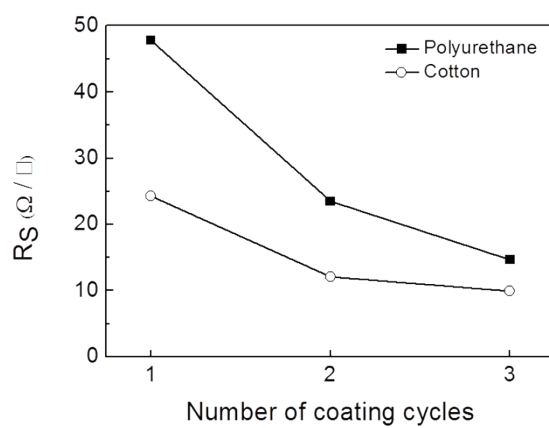

**Fig. S6** Sheet resistance of BD-PEDOT:PSS-cotton and –polyurethane with respect to the number of coating cycles

Supplementary Figure 7.

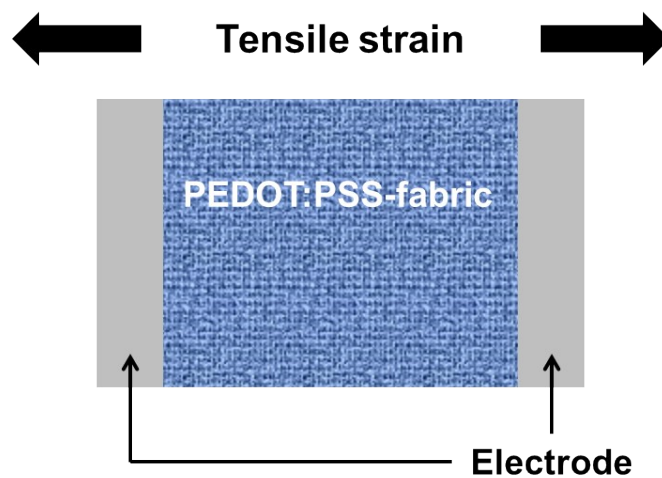

**Fig. S7** Schematic of strain experiment for PEDOT:PSS-fabric. Electrodes were formed by using Ag paste.



Supplementary Figure 8.

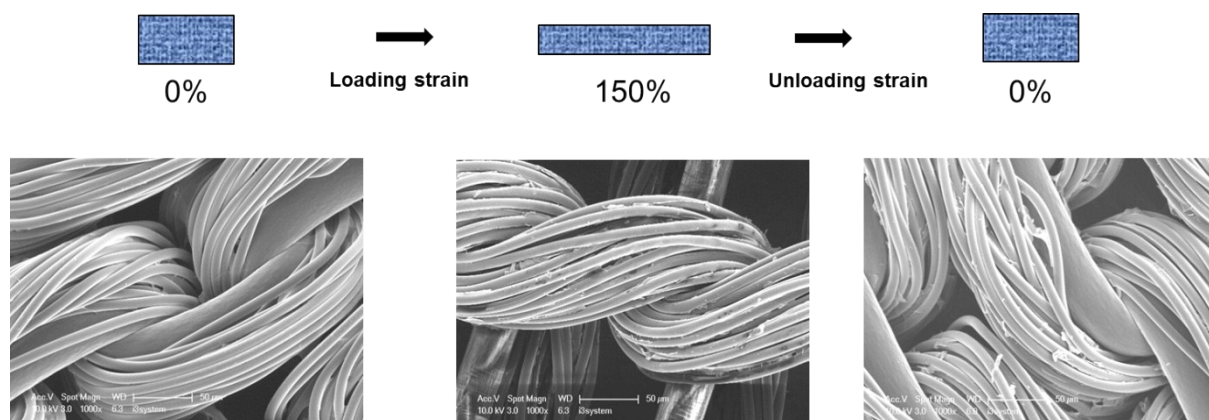

**Fig. S8** SEM images of BD-PEDOT:PSS-polyurethane before and after loading 150% tensile strain.

Supplementary Figure 9.

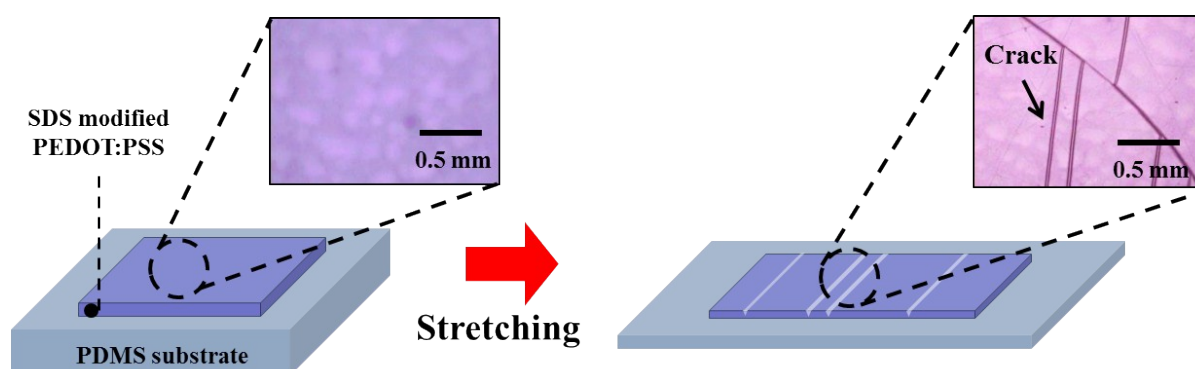

**Fig. S9** Schematic and optical images after stretching SDS modified PEDOT:PSS films spin-coated on PDMS substrate.

Supplementary Figure 10.

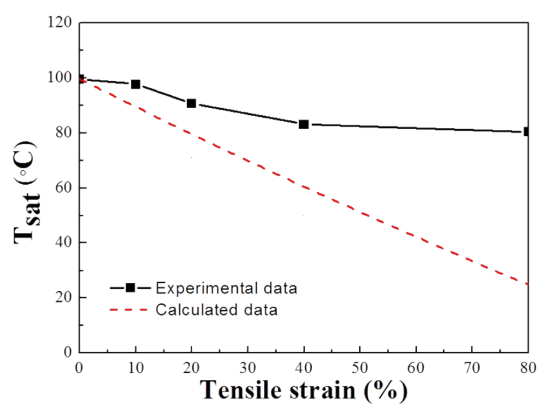

**Fig. S10** Saturated temperature of BD-PEDOT:PSS-cotton with respect to tensile strain. The dotted and single lines correspond to the calculated and experimental data, respectively. The 12 V was applied at 26 °C.
